# Supplementary material
Source: PubMed Central journal article supplement (PMC6971784)
Supplement: DC191360SupplementaryData.pdf [file DC191360SupplementaryData.pdf]

SUPPLEMENTARY DATA

**Supplementary Table 1.** Standard differences of all matching covariates between matched groups

|                                              | DM        |         | Non-DM    |         | SD difference |
|----------------------------------------------|-----------|---------|-----------|---------|---------------|
|                                              | Mean or N | SD or % | Mean or N | SD or % |               |
| Age                                          | 64        | 11      | 65        | 12      | 0.044         |
| Male                                         | 1,506     | 51      | 1,519     | 51      | 0.009         |
| BMI                                          | 31.0      | 7.3     | 30.8      | 7.2     | 0.026         |
| Hypertension                                 | 2,309     | 78      | 2,323     | 79      | 0.012         |
| Dyslipidemia                                 | 2,153     | 73      | 2,142     | 73      | 0.008         |
| Smoking                                      | 470       | 16      | 472       | 16      | 0.002         |
| Family history of CAD                        | 701       | 24      | 694       | 24      | 0.006         |
| Pharmacologic stress test                    | 1,753     | 60      | 1,796     | 61      | 0.030         |
| Scanner type (Proportion of D-SPECT scanner) | 1,515     | 51      | 1,533     | 52      | 0.012         |

Abbreviations: BMI, Body mass index; DM, diabetes mellitus; SD, standard deviation; CAD, coronary artery disease

SUPPLEMENTARY DATA

**Supplementary Table 2.** The predicted probability of at 1-year and 5-year MACE risk by TPD levels in DM and non-DM patients

|      | 1-year MACE risk |        | 5-year MACE risk |        |
|------|------------------|--------|------------------|--------|
| TPD  | DM               | Non-DM | DM               | Non-DM |
| 0.5% | 3.0%             | 1.9%   | 10.5%            | 7.0%   |
| 1%   | 3.1%             | 1.9%   | 11%              | 7.2%   |
| 3%   | 3.5%             | 2.2%   | 12.3%            | 8%     |
| 5%   | 4.0%             | 2.5%   | 14%              | 9%     |
| 10%  | 5.4%             | 3.4%   | 19%              | 11.5%  |
| 15%  | 7.4%             | 4.6%   | 25%              | 15%    |
| 20%  | 10%              | 6.4%   | 33.6%            | 19.3%  |
| 30%  | 19%              | 12%    | 56%              | 31%    |

Abbreviations: MACE, major adverse cardiovascular events; TPD, total perfusion deficit; DM, diabetes mellitus

SUPPLEMENTARY DATA

**Supplementary Table 3.** Subdistribution Hazard Ratio for MACE

|                                 | DM      |           |         | Non-DM  |           |         |
|---------------------------------|---------|-----------|---------|---------|-----------|---------|
|                                 | SHR     | 95% CI    | P-value | SHR     | 95% CI    | P-value |
| TPD, % increase*                | 1.05    | 1.03-1.06 | <0.001  | 1.03    | 1.00-1.05 | 0.041   |
| TPD category*                   |         |           |         |         |           |         |
| No deficit (TPD=0%)             | 1 (ref) | -         | -       | 1 (ref) |           |         |
| Very minimal<br>(0%<TPD<1%)     | 1.86    | 1.09-3.18 | 0.022   | 1.29    | 0.70-2.36 | 0.419   |
| Minimal (1%≤TPD<5%)             | 2.34    | 1.42-3.87 | 0.001   | 1.56    | 0.88-2.77 | 0.128   |
| Mild (5%≤TPD≤10%)               | 2.87    | 1.67-4.94 | <0.001  | 1.89    | 1.00-3.57 | 0.048   |
| Moderate to severe<br>(TPD>10%) | 4.47    | 2.57-7.78 | <0.001  | 2.06    | 1.02-4.16 | 0.045   |

Abbreviations: MACE, major adverse cardiovascular event; DM, diabetes mellitus; BMI, body mass index; TPD, total perfusion deficit; CAD, coronary artery disease; SHR, subdistribution hazard ratio; CI, confidence interval  
 \* Multivariate analysis including all matching variables and center location

SUPPLEMENTARY DATA

**Supplementary Figure 1.** Annualized MACE rate in DM and non-DM patients according to the continuous TPD level

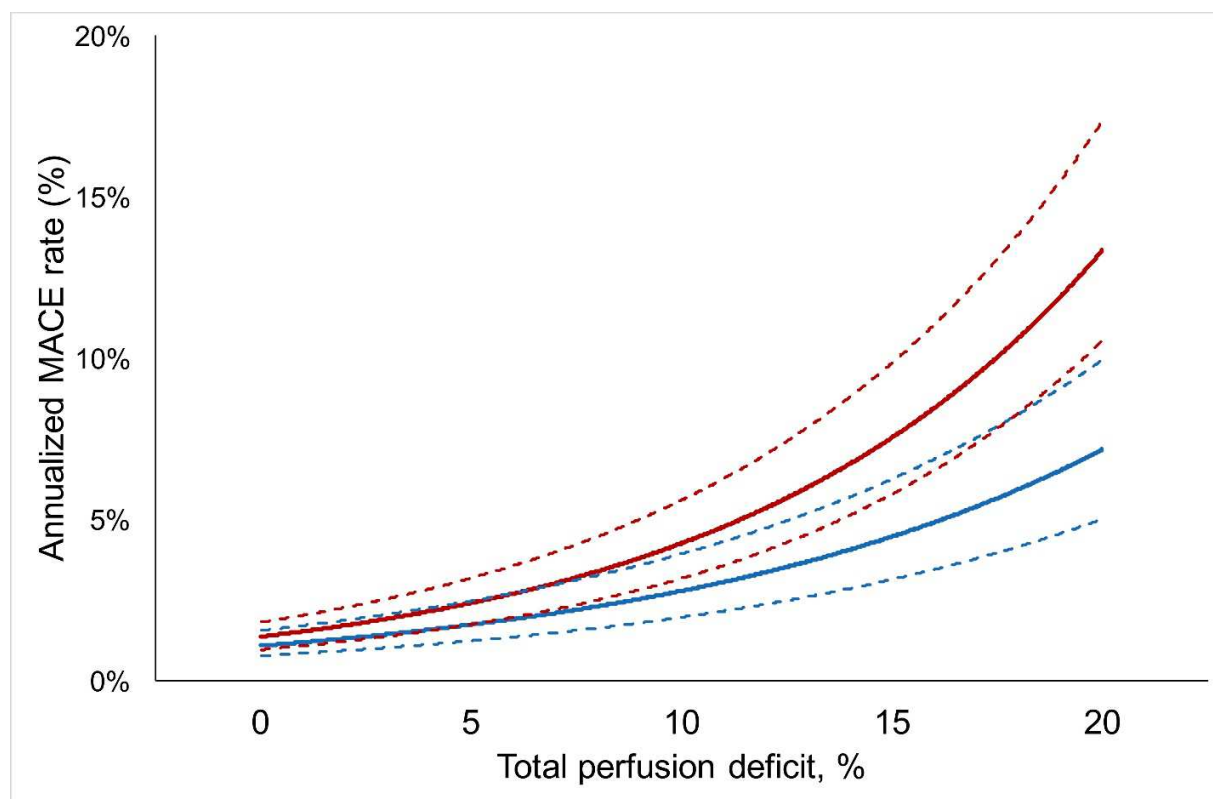

Abbreviations: MACE, major adverse cardiovascular events
